# Supplementary material for: Combination of inflammation-related cytokines promotes long-term muscle stem cell expansion
Source: PubMed Central journal article supplement — Cell Res. 2015 May 15;25(6):655–73. doi: 10.1038/cr.2015.58 (PMC4456625; doi:10.1038/cr.2015.58), 2015-05-15
Supplement: cr201558x1.pdf [file cr201558x1.pdf]

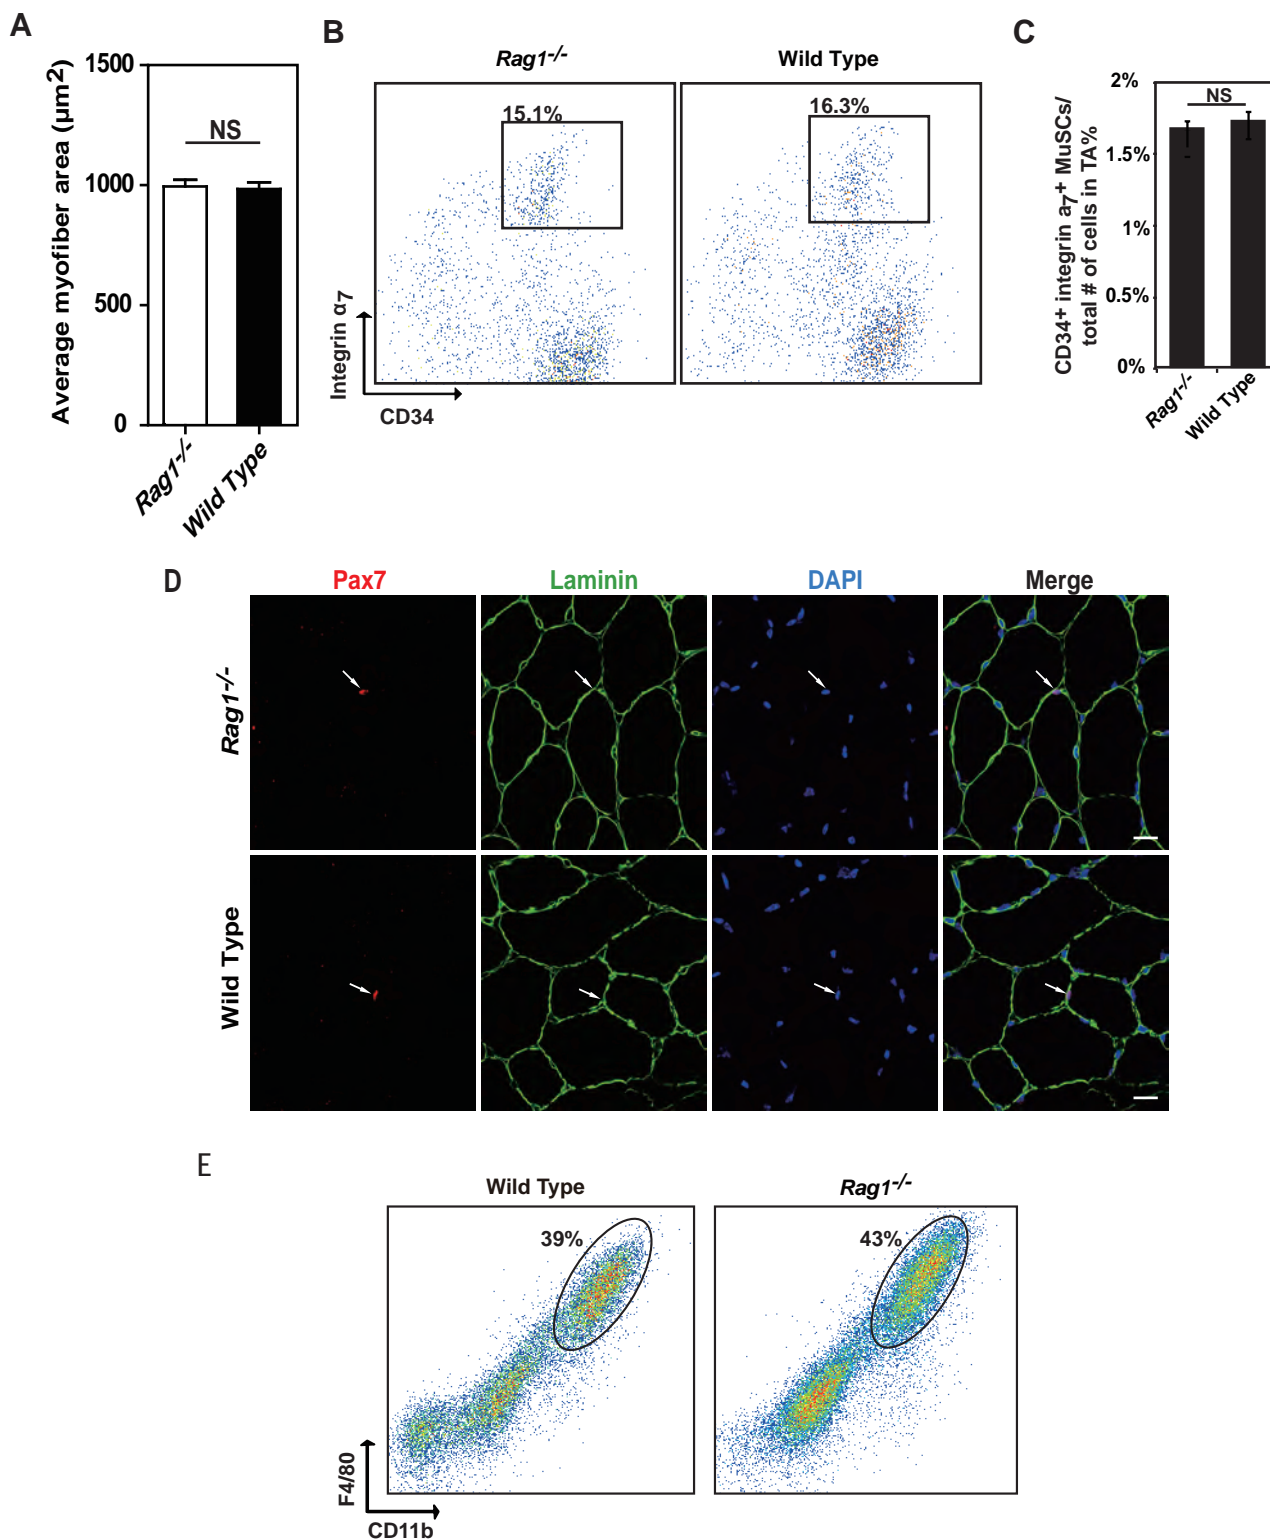

Figure S1. MuSCs displayed the similar properties in uninjured muscles from *Rag1*<sup>-/-</sup> and wild type mice, Related to Figure 1

(A) Statistical analysis of myofiber size of TA muscles from *Rag1*<sup>-/-</sup> and wild type mice. Error bars were based on 3 independent experiments. NS indicated statistically insignificant.

(B) Representative FACS analysis of MuSCs from mono-nucleus cells isolated from TA muscles in uninjured *Rag1*<sup>-/-</sup> and wild type mice, respectively. CD34<sup>+</sup>intergrin  $\alpha 7$ <sup>+</sup> population represents MuSCs.

(C) Statistical analysis of the percentage of MuSCs in the total number of cells from one TA muscle. Error bars were calculated based on 4 independent experiments.

(D) Pax7 staining of TA muscle sections from uninjured *Rag1*<sup>-/-</sup> and WT mice. Arrows indicated Pax7(red) positive MuSCs located underneath laminin (green). Scale bars, 20  $\mu\text{m}$ .

(E) FACS analysis of CD11b<sup>+</sup> F4/80<sup>+</sup> macrophage profile in TA muscles 3 days post muscle injury induced by CTX injection in *Rag1*<sup>-/-</sup> and wild type mice. There was no significant changes on the percentage of macrophages in the above two strains.
