# Supplementary material for: Combination of inflammation-related cytokines promotes long-term muscle stem cell expansion
Source: PubMed Central journal article supplement — Cell Res. 2015 May 15;25(6):655–73. doi: 10.1038/cr.2015.58 (PMC4456625; doi:10.1038/cr.2015.58), 2015-05-15
Supplement: cr201558x2.pdf [file cr201558x2.pdf]

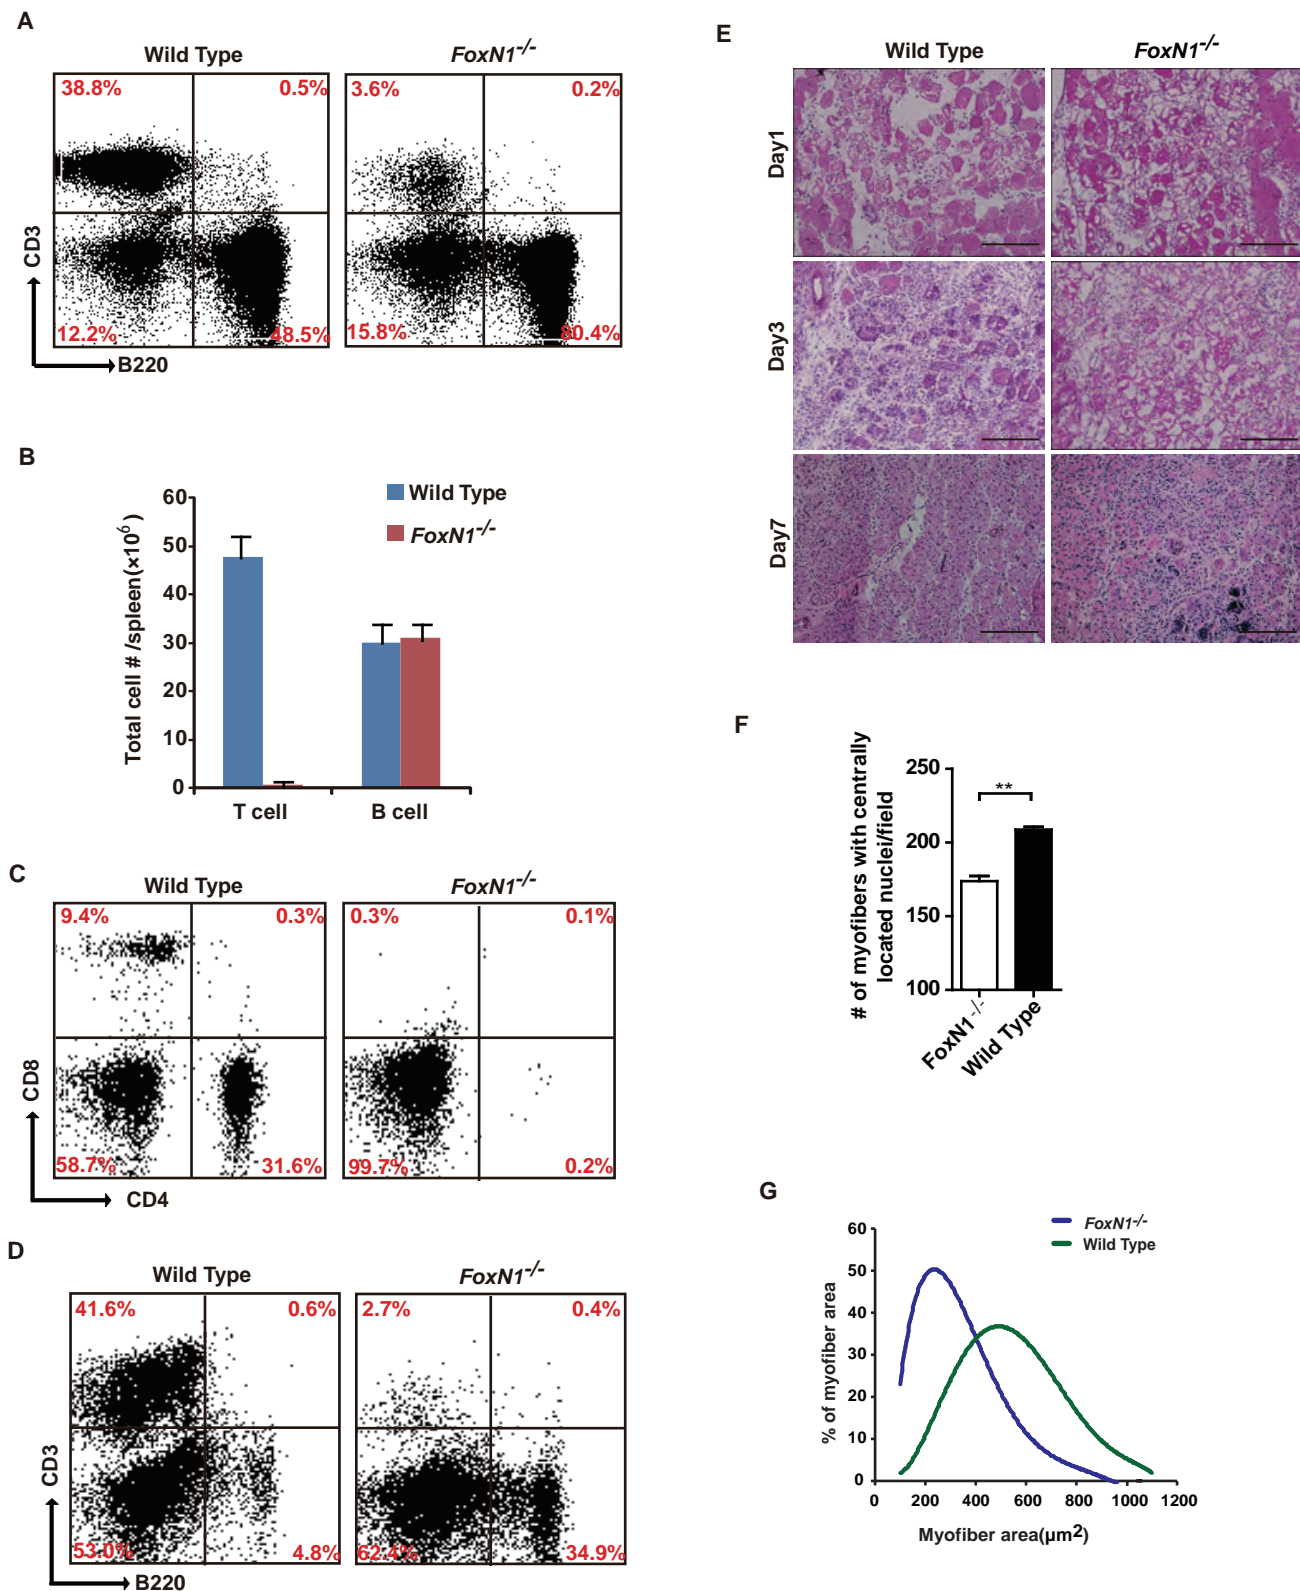

Figure S2. *FoxN1*<sup>-/-</sup> mice displayed muscle regeneration defects, Related to Figure 1

(A) FACS analysis of T (CD3<sup>+</sup>) and B (B220<sup>+</sup>) cell profiles in spleen from wild type or *FoxN1*<sup>-/-</sup> mice.

(B) Statistical analysis of T (CD3<sup>+</sup>) and B (B220<sup>+</sup>) cell numbers in spleen from wild type or *FoxN1*<sup>-/-</sup> mice. Error bars were based on 3 independent experiments.

(C) FACS analysis of CD4<sup>+</sup> and CD8<sup>+</sup> T cells infiltrated in TA muscles at day 3 post muscle injury in wild type or *FoxN1*<sup>-/-</sup> mice.

(D) FACS analysis of T (CD3<sup>+</sup>) and B (B220<sup>+</sup>) cell profiles in TA muscles day 3 post muscle injury in wild type or *FoxN1*<sup>-/-</sup> mice.

(E) HE staining of muscle tissue sections from wild type or *FoxN1*<sup>-/-</sup> mice 1, 3, and 7 days after muscle injury. Scale bars, 200µm.

(F) Statistical analysis of the number of myofibers with centrally located nuclei at day 7 post muscle injury in wild type or *FoxN1*<sup>-/-</sup> mice. \*\* indicated statistically significant,  $p < 0.01$ . Error bars were based on 3 independent experiments.

(G) Statistical analysis of the myofiber size 12 days post injury in wild type or *FoxN1*<sup>-/-</sup> mice. The distribution map of the different myofiber sizes was based on average of 3 independent experiments.
