# Supplementary material for: Combination of inflammation-related cytokines promotes long-term muscle stem cell expansion
Source: PubMed Central journal article supplement — Cell Res. 2015 May 15;25(6):655–73. doi: 10.1038/cr.2015.58 (PMC4456625; doi:10.1038/cr.2015.58), 2015-05-15
Supplement: cr201558x3.pdf [file cr201558x3.pdf]

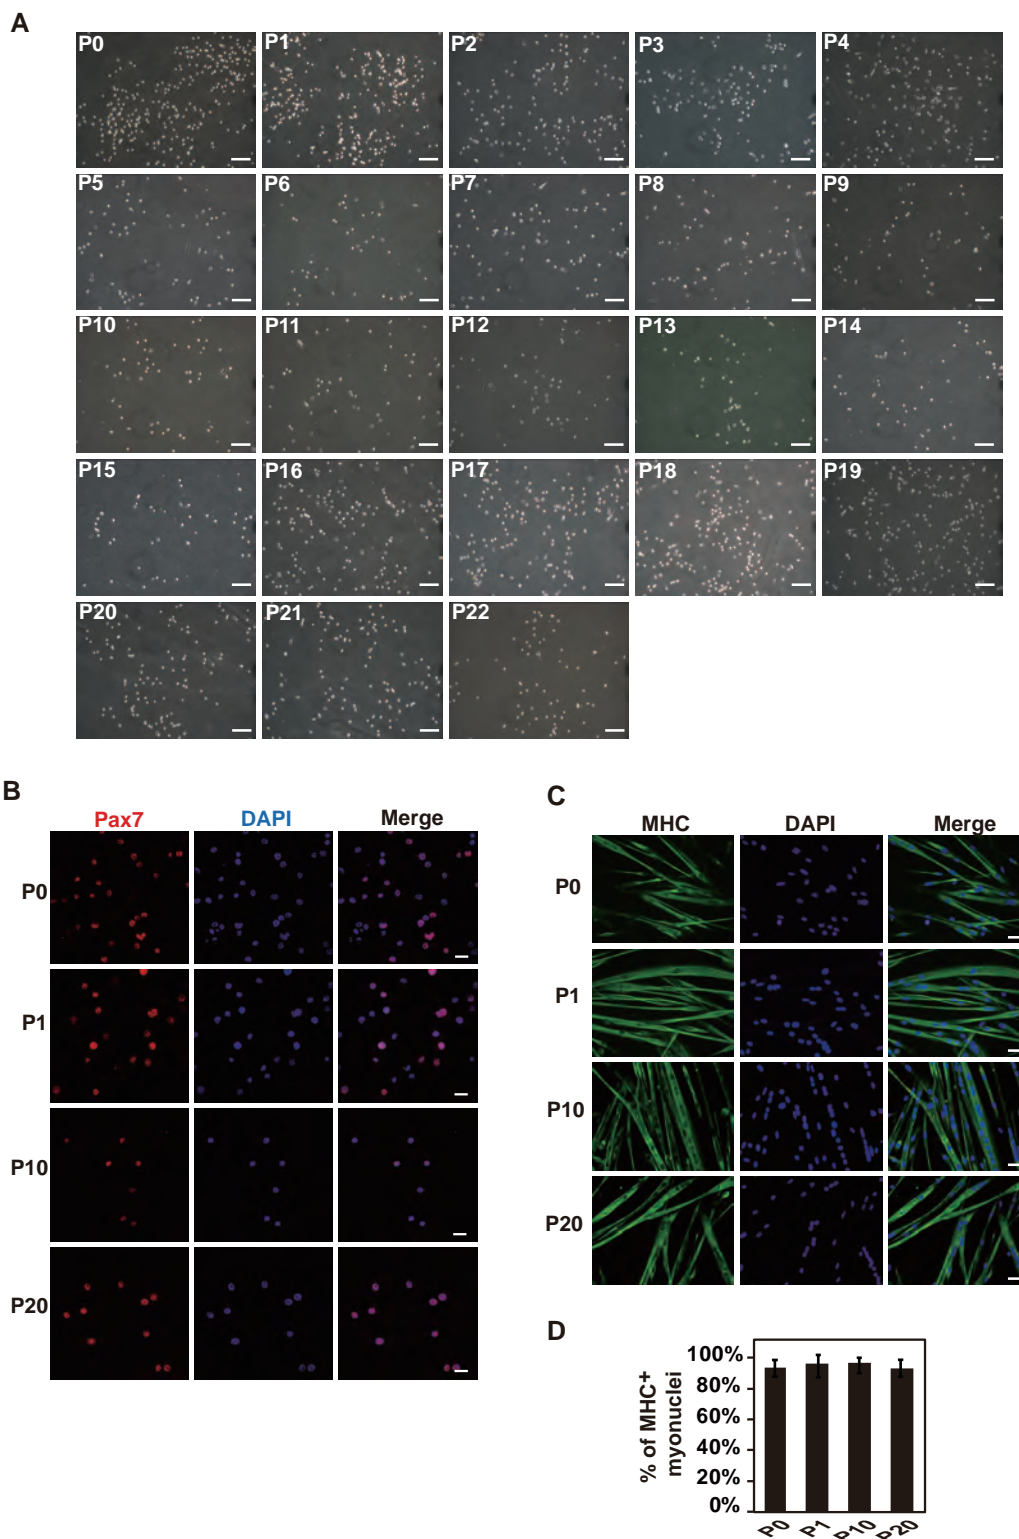

Figure S3. Serial expanded MuSCs in T cell conditional medium displayed normal cell morphologies and differentiation abilities, Related to Figure 2

(A) Phase contrast images of MuSCs serially expanded in T cell conditional medium, passage numbers were indicated at the upper left corner of each panel. Scale bar, 200  $\mu$ m.

(B) Representative Pax7 staining of MuSCs serially expanded in T cell medium. Passage numbers were indicated at the left side of each panel. Red indicated Pax7 staining; DAPI indicated nuclei staining, Merge indicated merged images of Pax7 and DAPI staining. Scale bar, 20  $\mu$ m.

(C) Representative images of the differentiation potentials of MuSCs serially expanded in T cell conditional medium. myosin heavy chain staining were performed to examine the differentiation status. Green indicated MHC staining; DAPI indicated nuclei staining; Merge indicated merged images of MYH and DAPI staining. Scale bar, 20  $\mu$ m.

(D) Statistical analysis of differentiation efficiency of expanded MuSCs. Error bars were based on 3 independent experiments.
