# Supplementary material for: Combination of inflammation-related cytokines promotes long-term muscle stem cell expansion
Source: PubMed Central journal article supplement — Cell Res. 2015 May 15;25(6):655–73. doi: 10.1038/cr.2015.58 (PMC4456625; doi:10.1038/cr.2015.58), 2015-05-15
Supplement: cr201558x5.pdf [file cr201558x5.pdf]

A

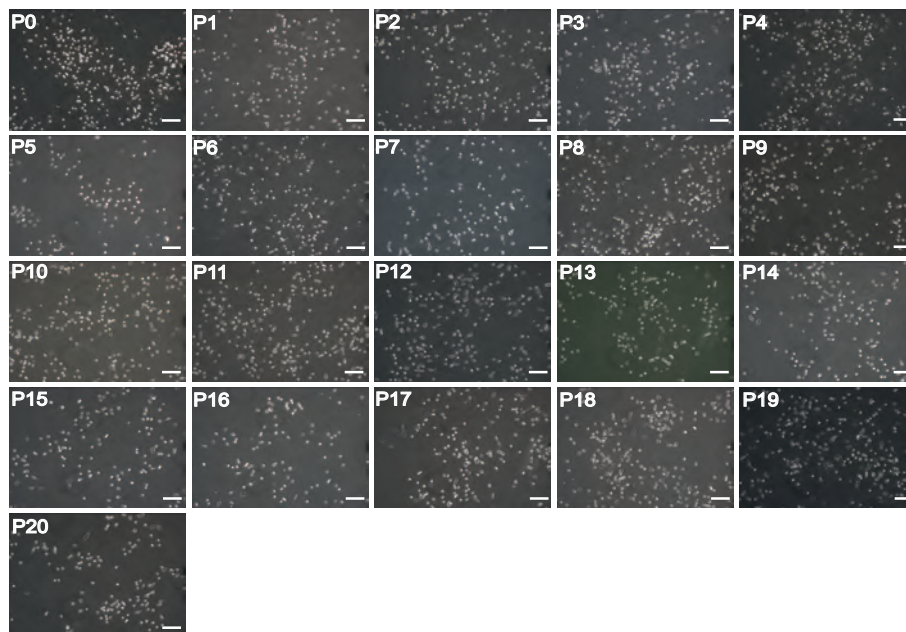

B

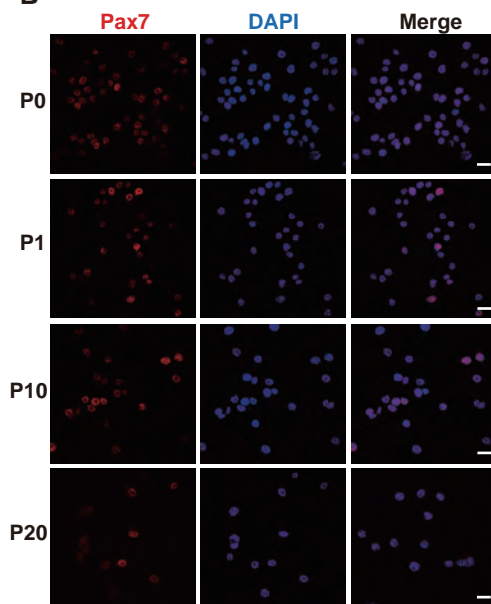

C

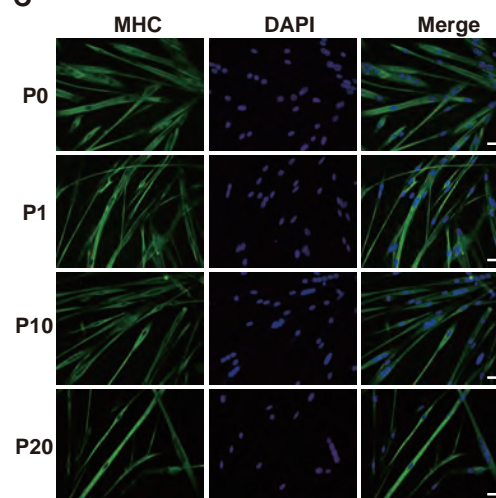

D

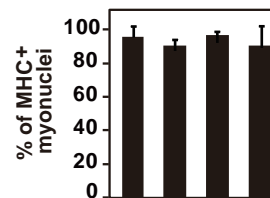

E

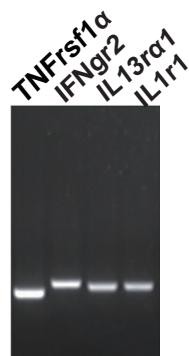

F

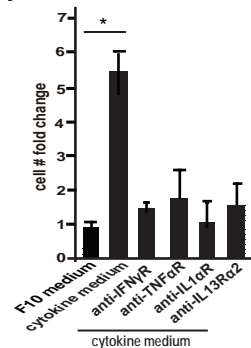

Figure S5 MuSCs serially expanded in cytokine medium displayed normal cell morphologies and differentiation potentials, Related to Figure 4

(A) Phase contrast images of MuSCs serially expanded in cytokine cocktail containing medium. Passage numbers were indicated at the upper left corner of each panel. Scale bars, 200  $\mu$ m.

(B) Representative images of Pax7 staining of MuSCs serially expanded in cytokine cocktail containing medium. Passage numbers were indicated at the left side of each panel. Red indicated Pax7 staining; DAPI indicated nuclei staining; Merge indicated merged images of Pax7 and DAPI staining. Scale bars, 20  $\mu$ m.

(C) Representative images of differentiated MuSCs. MHC staining was performed to indicate the differentiation status of MuSCs serially expanded in cytokine medium. Green indicated MHC staining; DAPI indicated nuclei staining; Merge indicated merged images of MHC and DAPI staining. Scale bars, 20  $\mu$ m.

(D) Statistical analysis of the differentiation efficiency of MuSCs. Error bars were based 3 independent experiments.

(E) RT-PCR analysis were performed to detect the expression of the receptors of the four cytokines in MuSCs.

(F) Blocking the cytokine receptors by antibodies inhibited MuSC proliferation in cytokine medium. Error bars were based on 3 independent experiments. \* indicated statistically significant,  $p < 0.01$ .
