# Supplementary material for: Combination of inflammation-related cytokines promotes long-term muscle stem cell expansion
Source: PubMed Central journal article supplement — Cell Res. 2015 May 15;25(6):655–73. doi: 10.1038/cr.2015.58 (PMC4456625; doi:10.1038/cr.2015.58), 2015-05-15
Supplement: cr201558x6.pdf [file cr201558x6.pdf]

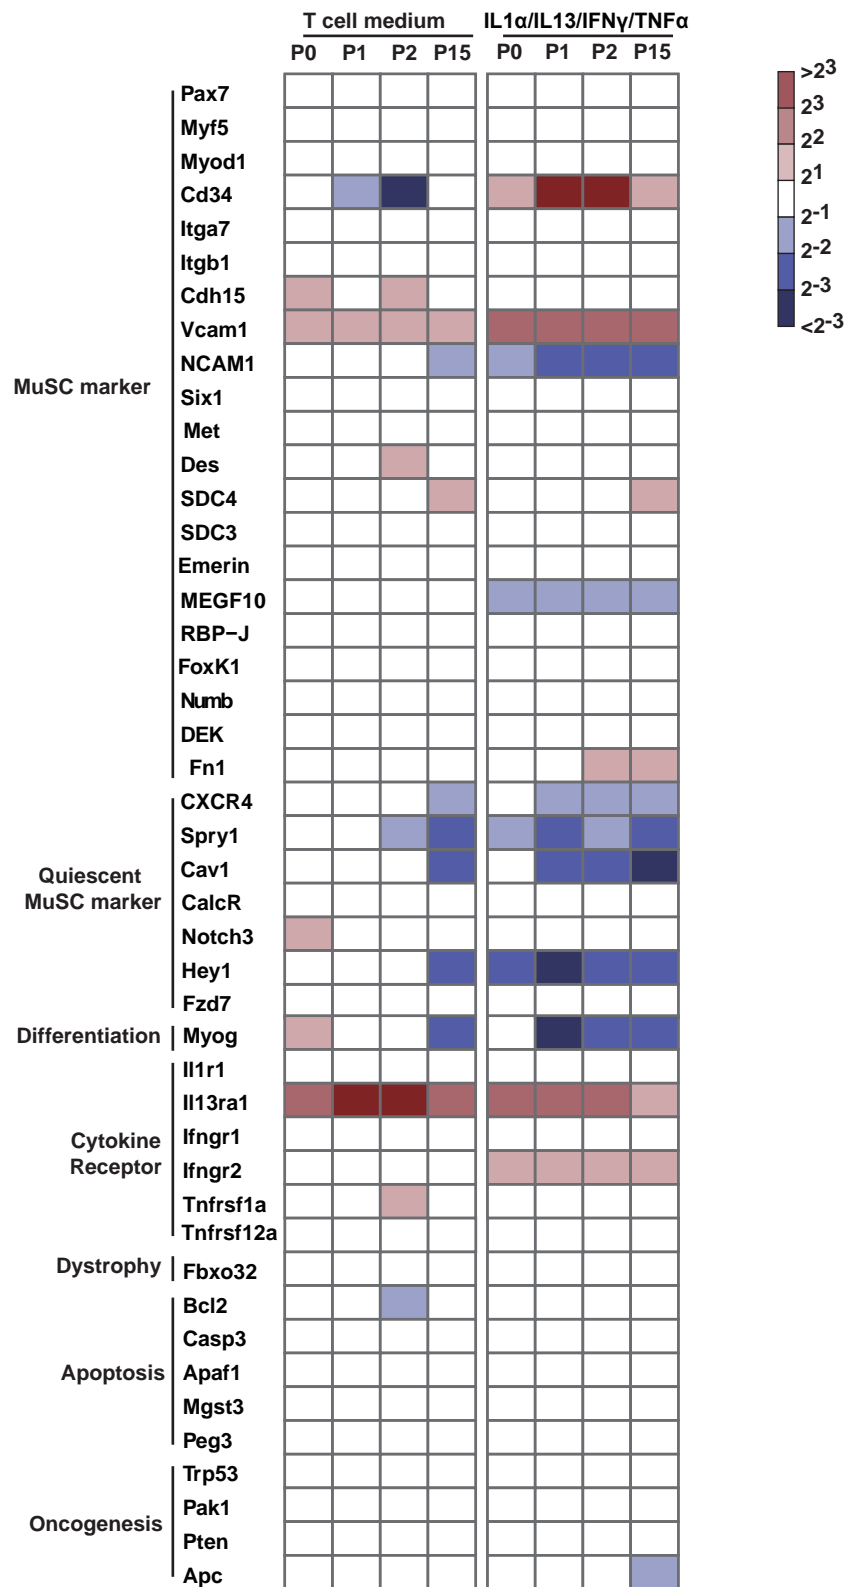

Figure S6 Heat map of expression levels of the selected genes in MuSCs expanded in various media, related to Figure 6 Heat map of expression levels of the selected genes related to MuSC stemness, differentiation, cytokine receptors, dystrophy, apoptosis, and oncogenesis from MuSCs serially expanded in T cell conditional medium or cytokine cocktail containing medium compared to P0 MuSCs cultured in F10 medium for 12hrs. The passage number was indicated on top of the graph.
