# Supplementary material for: Combination of inflammation-related cytokines promotes long-term muscle stem cell expansion
Source: PubMed Central journal article supplement — Cell Res. 2015 May 15;25(6):655–73. doi: 10.1038/cr.2015.58 (PMC4456625; doi:10.1038/cr.2015.58), 2015-05-15
Supplement: cr201558x7.pdf [file cr201558x7.pdf]

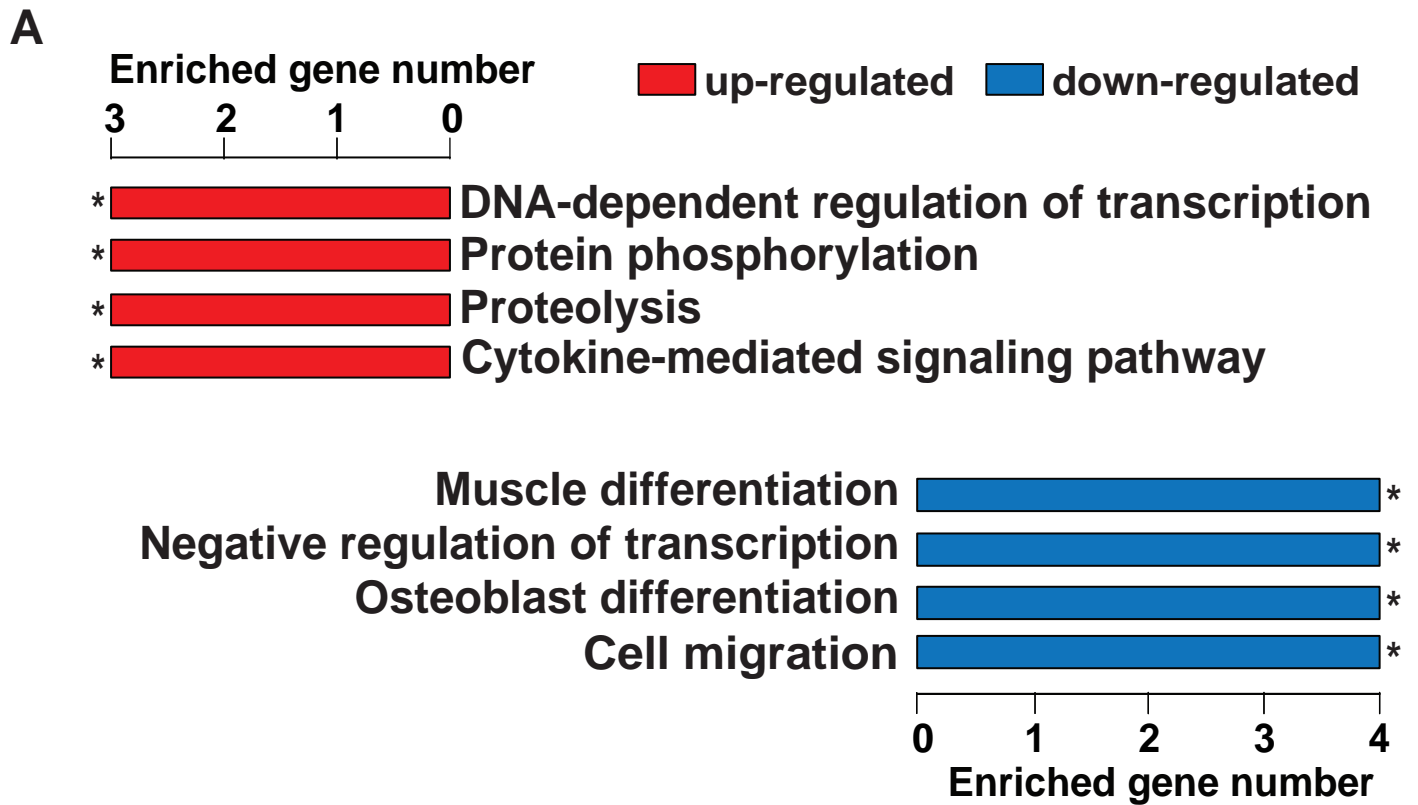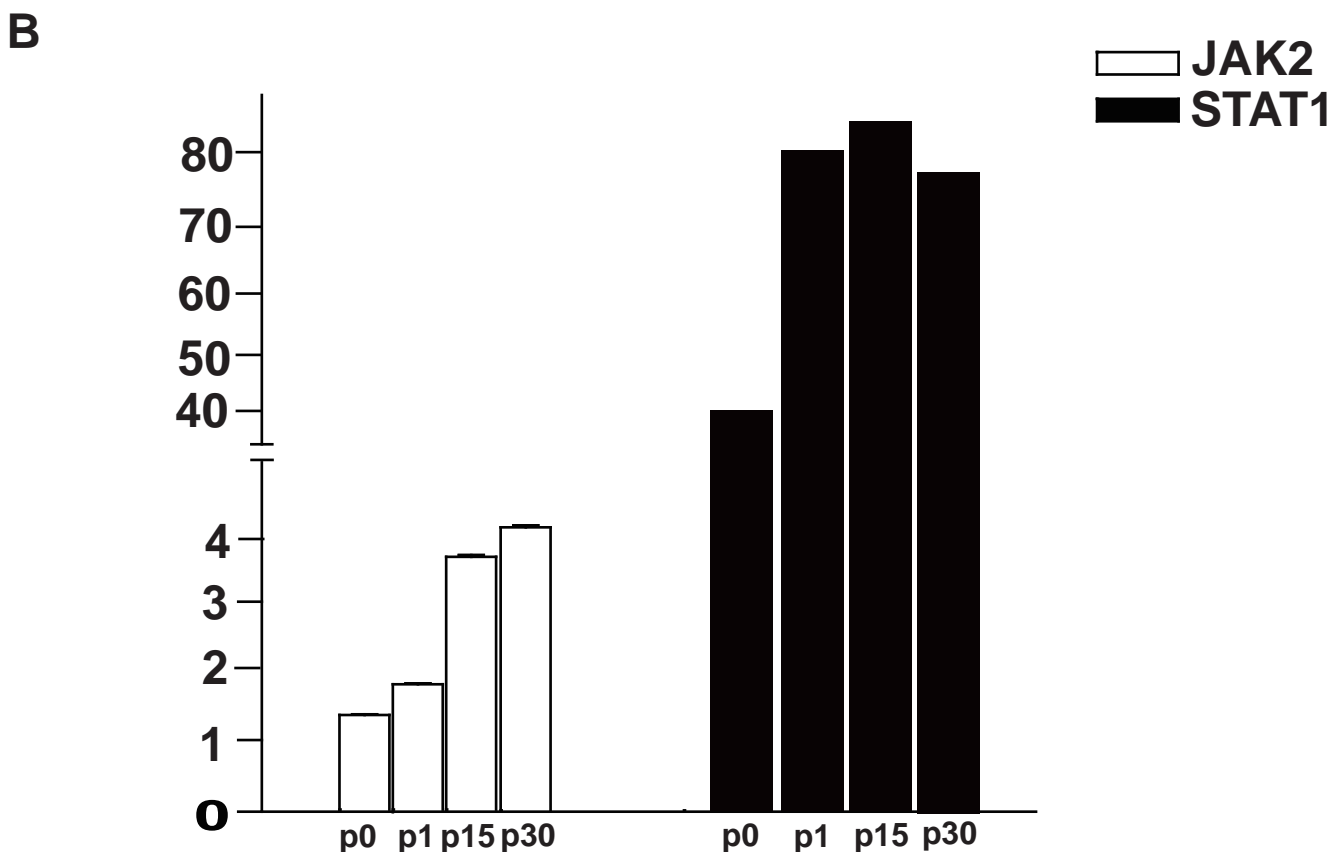

Figure S7. Analysis of upregulated or downregulated pathways from mRNA-seq, Related with Figure 6

A. GO analysis of enrich pathways upregulated or downregulated in MuSCs expanded in cytokine medium. Red bars indicated upregulated pathways; Blue bars indicated downregulated pathways.  $p < 0.01$ .

B. JAK2 and STAT1 were significantly upregulated in MuSCs expanded in cytokine medium.  $p < 0.01$ .
