# Supplementary material for: Combination of inflammation-related cytokines promotes long-term muscle stem cell expansion
Source: PubMed Central journal article supplement — Cell Res. 2015 May 15;25(6):655–73. doi: 10.1038/cr.2015.58 (PMC4456625; doi:10.1038/cr.2015.58), 2015-05-15
Supplement: cr201558x8.pdf [file cr201558x8.pdf]

## Supplementary information, Table S1

**Table S1** Removal of any one of the components from the four cytokine cocktail led to defects in MuSC expansion, related to Figure 3.

| Combination of cytokines                    | Defects                                                                                                                                                                        |
|---------------------------------------------|--------------------------------------------------------------------------------------------------------------------------------------------------------------------------------|
| IL-1 $\alpha$ / IL-13/TNF- $\alpha$         | Cell proliferation abilities decreased dramatically, more cells differentiated, Myogenin expression levels increased dramatically, expansion abilities decreased significantly |
| IL-1 $\alpha$ /IL-13/IFN- $\gamma$          | Cell proliferation abilities decreased dramatically, more cells differentiated, Myogenin expression levels increased dramatically                                              |
| IL-1 $\alpha$ /TNF- $\alpha$ /IFN- $\gamma$ | Cell proliferation abilities decreased dramatically, Myogenin expression levels increased slightly                                                                             |
| IL-13/ TNF- $\alpha$ /IFN- $\gamma$         | Cell proliferation abilities decreased slightly, more cells differentiated, Pax7 expression levels decreased, Myogenin expression levels increased dramatically                |
